# Supplementary material
Source: HighWire-hosted journal article supplement (http://molpharm.aspetjournals.org/highwire/filestream/76883/field_highwire_adjunct_files/0/Sergei_Suppl_Fig._2.pdf)
Supplement: Sergei_Suppl_Fig._2.pdf [file Sergei_Suppl_Fig._2.pdf]

**Iron Chelators of the DpT and BpT Series Inhibit HIV-1 Transcription: Identification of Novel Cellular Targets – Iron, CDK2 and CDK9. Debebe, Z., Ammosova, T., Breuer, D., Lovejoy, D.B., Kalinowski, D.S., Karla, P.K., Kumar, K, Jerebtsova, M., Ray, P., Kashanchi, F. Gordeuk, V.R., Richardson, D.R. and Nekhai, S. *Molecular Pharmacology***

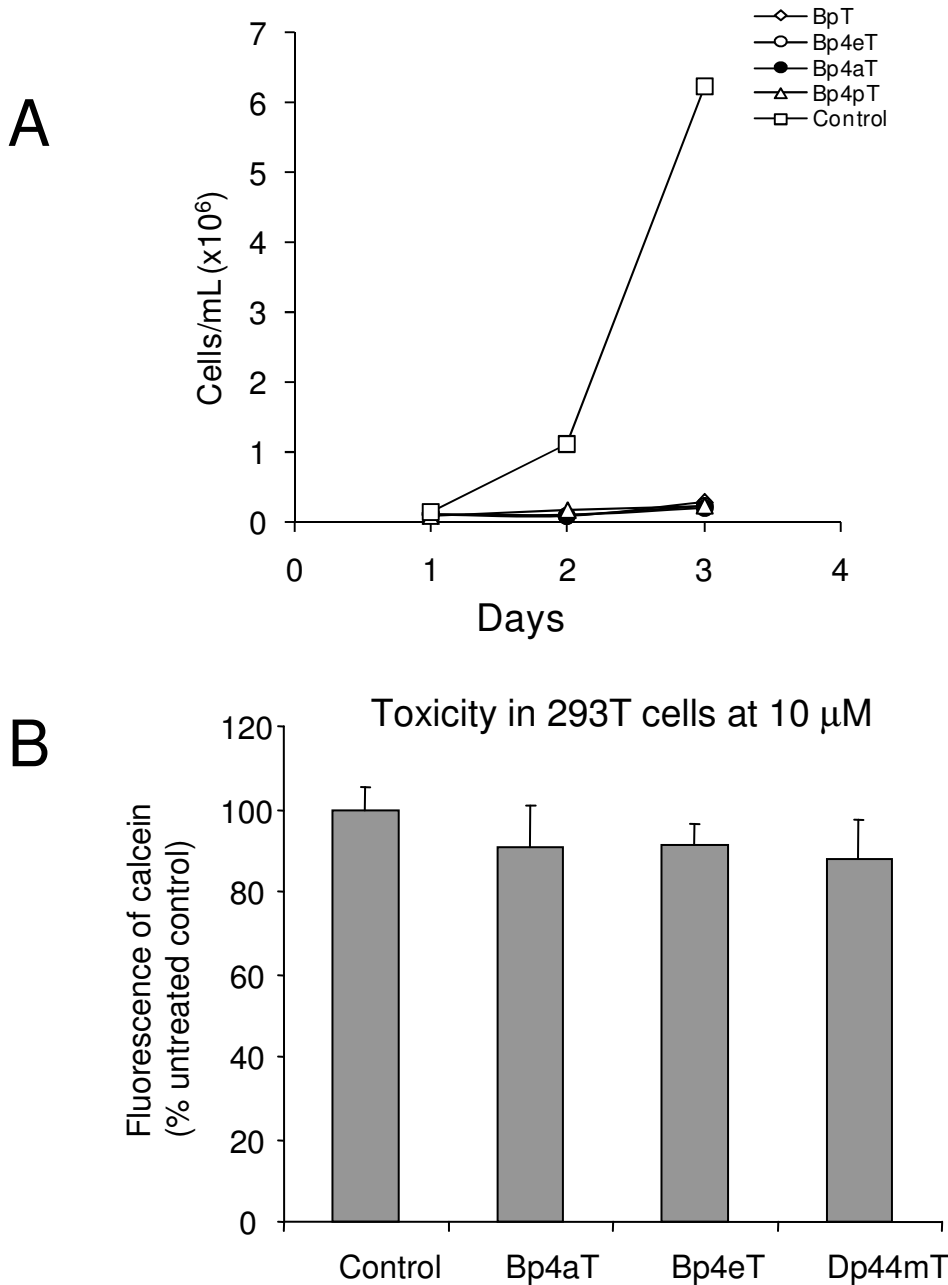

**Supplemental Figure 2.** (A) CEM T cells were incubated with 10  $\mu$ M Bp4aT, Bp4eT, Bp4pT and BpT for the indicated number of days. The cells were supplemented with trypan blue and counted using a hemacytometer. Results were plotted as cell numbers and are means from 2 experiments. (B) **Cytotoxicity of iron chelators using 293T cells.** 293T cells were incubated with Bp4aT, Bp4eT and Dp44mT at 10  $\mu$ M for 24 h at 37°C. Cells were washed with PBS, incubated with 0.2  $\mu$ M calcein-AM and fluorescence was measured at an excitation of 495 nm and an emission of 515 nm. Values presented are mean  $\pm$  SD ( $n = 4$ ) and are typical of 3 independent experiments.
